# Supplementary material for: The NADPH oxidase NOX2 mediates loss of parvalbumin interneurons in traumatic brain injury: human autoptic immunohistochemical evidence
Source: PubMed Central journal article supplement (PMC5562735; doi:10.1038/s41598-017-09202-4), 2017-08-18
Supplement: 41598_2017_9202_MOESM1_ESM.pdf [file 41598_2017_9202_MOESM1_ESM.pdf]

**The NADPH oxidase NOX2 mediates loss of parvalbumin interneurons in traumatic brain injury: human autopic immunohistochemical evidence**

*Stefania Schiavone*§, *Margherita Neri*§, *Luigia Trabace*#\*, *Emanuela Turillazzi*#

§These authors equally contributed

#These authors equally contributed

\*Corresponding Author

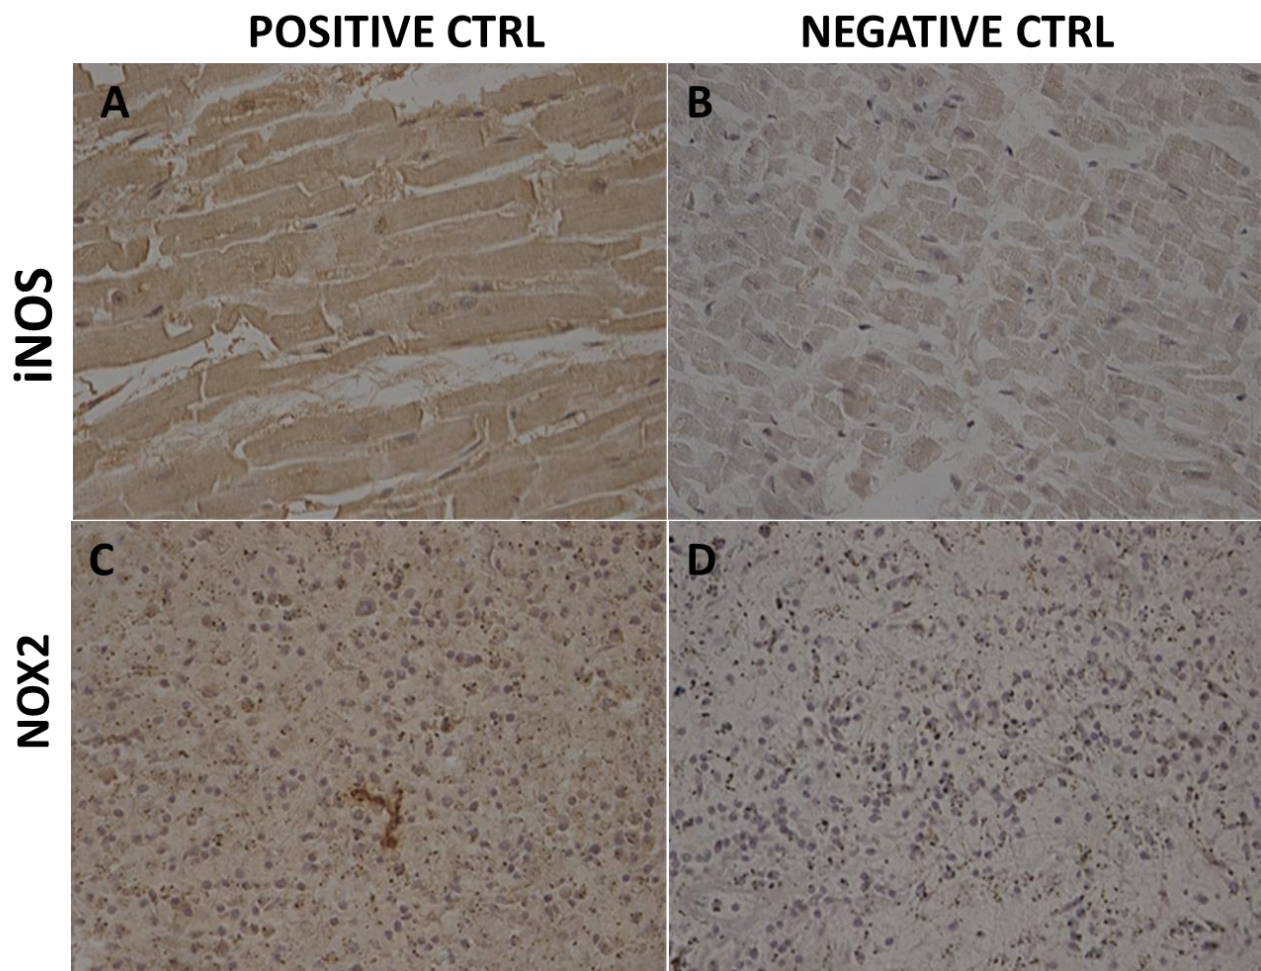

**Supplementary Fig. 1: iNOS and NOX2 immunostaining specificity test**

- A) Representative image of iNOS immunostaining on heart (positive control).
- B) Representative image of iNOS immunostaining on heart without primary antibody anti-iNOS (technical negative control).

C) Representative image of NOX2 immunostaining on spleen (positive control).

D) Representative image of NOX2 immunostaining on spleen without primary antibody anti-NOX2 (technical negative control).
