# Supplementary material for: The NADPH oxidase NOX2 mediates loss of parvalbumin interneurons in traumatic brain injury: human autoptic immunohistochemical evidence
Source: PubMed Central journal article supplement (PMC5562735; doi:10.1038/s41598-017-09202-4), 2017-08-18
Supplement: 41598_2017_9202_MOESM2_ESM.pdf [file 41598_2017_9202_MOESM2_ESM.pdf]

# The NADPH oxidase NOX2 mediates loss of parvalbumin interneurons in traumatic brain injury: human autopic immunohistochemical evidence

Stefania Schiavone $\S$ , Margherita Neri $\S$ , Luigia Trabace $\#\ast$ , Emanuela Turillazzi $\#$

$\S$ These authors equally contributed

$\#$ These authors equally contributed

$\ast$ Corresponding Author

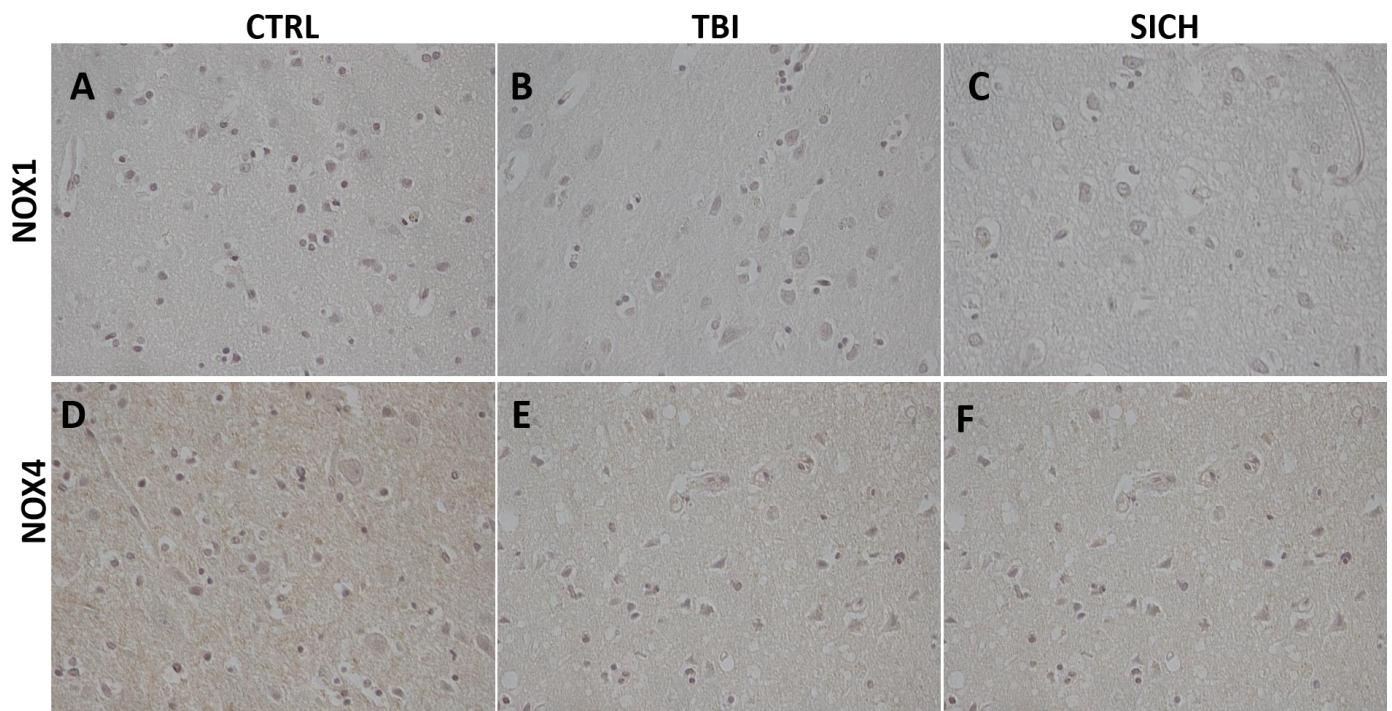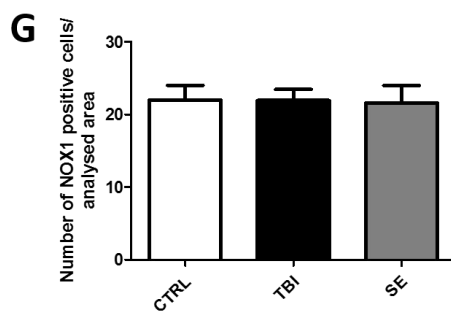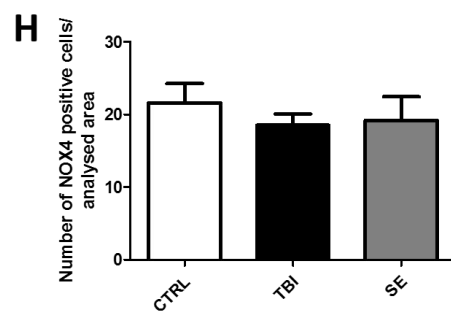

### **Supplementary Fig. 2: NOX1 and NOX4 expression**

(A-C) Representative images of NOX1 immunostaining in the cortex of controls (CTRL, n=5) (A), subjects died following TBI (TBI, n=15) (B) and subjects died following spontaneous intracerebral hemorrhage (SICH, n=5) (C).

(D-F) Representative images of NOX4 immunostaining in the cortex of controls (CTRL, n=5) (D), subjects died following TBI (TBI, n=15) (E) and subjects died following spontaneous intracerebral hemorrhage (SICH, n=5) (F).

(G) Quantification of NOX1-positive-stained cells in the cortex of controls (CTRL, n=5), subjects died following TBI (TBI, n=15) and subjects died spontaneous intracerebral hemorrhage (SICH, n=5). Results are expressed as means  $\pm$  s.e.m. One-way ANOVA, followed by Tukey's post hoc test,  $F= 0,008367$ ;  $P= 0,8332$ .

(H) Quantification of NOX4-positive-stained cells in the cortex of controls (CTRL, n=5), subjects died following TBI (TBI, n=15) and subjects died spontaneous intracerebral hemorrhage (SICH, n=5). Results are expressed as means  $\pm$  s.e.m. One-way ANOVA, followed by Tukey's post hoc test,  $F= 0,4614$ ;  $P= 0,6364$ .
